# Supplementary material
Source: PubMed Central journal article supplement (PMC3105442)
Supplement: NIHMS278020-supplement-supplement_1.pdf [file NIHMS278020-supplement-supplement_1.pdf]

**SUPPORTING INFORMATION**

Additional Supporting Information may be found in the online version of this article:

**Figure S1.** Representative confocal laser scanning microscopy images of *Streptococcus mutans* biofilms grown on glass slides.

**Figure S2.** Schematic diagram of *smu.44* and *smu.46* and their flanking regions.

**Table S1.** Classification of genes identified in LuxS-deficient *Streptococcus mutans* planktonic cultures ( $P < 0.01$ ).

**Table S2.** Classification of genes identified in LuxS-deficient *Streptococcus mutans* biofilms ( $P < 0.01$ ).

Please note: Wiley-Blackwell are not responsible for the content or functionality of any supporting materials supplied by the authors. Any queries (other than missing material) should be directed to the corresponding author of the article.
