# Supplementary material
Source: PubMed Central journal article supplement (PMC3105442)
Supplement: NIHMS278020-supplement-Table_1S.pdf [file NIHMS278020-supplement-Table_1S.pdf]

**Table S1. Classification of genes identified in LuxS-deficient *S. mutans* planktonic cultures ( $P < 0.01$ )<sup>@</sup>**

| Locus                                                    | Description and putative function                           | Fold-difference* | Parametric <i>P</i> value | Status in Sztajer's study |
|----------------------------------------------------------|-------------------------------------------------------------|------------------|---------------------------|---------------------------|
| Hypothetic proteins                                      |                                                             |                  |                           |                           |
| SMU.1141c                                                | conserved hypothetical protein                              | 1.64             | 6.60E-03                  |                           |
| SMU.1151c                                                | conserved hypothetical protein                              | 1.72             | 4.70E-03                  |                           |
| SMU.1347c                                                | conserved hypothetical protein, possible permease           | -3.4             | 1.40E-05                  |                           |
| SMU.1716c                                                | conserved hypothetical protein                              | 1.79             | 1.50E-03                  |                           |
| SMU.1780                                                 | conserved hypothetical protein                              | -1.57            | 5.60E-03                  |                           |
| SMU.1972c                                                | conserved hypothetical protein                              | 1.75             | 1.60E-03                  |                           |
| SMU.2155                                                 | conserved hypothetical protein                              | -1.8             | 6.10E-03                  |                           |
| SMU.613                                                  | hypothetical protein                                        | -1.68            | 6.90E-03                  | v                         |
| Chaperone                                                |                                                             |                  |                           |                           |
| SMU.188c                                                 | 33 kD chaperonin (heat shock protein)                       | 1.72             | 2.80E-03                  |                           |
| Carbohydrate, energy and central intermediate metabolism |                                                             |                  |                           |                           |
| SMU.1420                                                 | putative oxidoreductase, NADPH-quinone reductase            | 1.56             | 7.30E-03                  |                           |
| SMU.1664c                                                | putative acetoin utilization protein, acetoin dehydrogenase | -1.51            | 5.50E-03                  |                           |
| SMU.1687                                                 | putative manganese-dependent inorganic pyrophosphatase      | 1.72             | 2.40E-03                  |                           |
| SMU.1877                                                 | PTS system, mannose-specific component IIB                  | -3.63            | 2.00E-07                  | v                         |
| SMU.1878                                                 | PTS system, mannose-specific component IIC                  | -3.1             | 3.90E-05                  | v                         |
| SMU.1879                                                 | PTS system, mannose-specific component IID                  | -4.77            | 1.00E-07                  |                           |
| SMU.1960c                                                | PTS system, fructose-specific IIB component, LevE           | -1.57            | 3.80E-03                  | v                         |
| SMU.78                                                   | fructan hydrolase exo-beta-D-fructosidase; fructanase, FruA | 2.7              | 4.80E-03                  |                           |
| SMU.870                                                  | transcriptional regulator of sugar metabolism, FruR         | -3.39            | 3.90E-03                  |                           |
| SMU.871                                                  | fructose-1-phosphate kinase                                 | -4.02            | 6.10E-03                  |                           |
| SMU.872                                                  | fructose-specific enzyme IABC component                     | -7.67            | 2.70E-06                  | v                         |
| SMU.985                                                  | beta-glucosidase BglA                                       | 1.79             | 7.70E-03                  |                           |
| Nucleic acid metabolism                                  |                                                             |                  |                           |                           |
| SMU.322c                                                 | glucose-1-phosphate uridylyltransferase                     | 1.64             | 9.10E-03                  |                           |
| SMU.1054                                                 | putative glutamine amidotransferase                         | 2.05             | 4.10E-04                  | v                         |
| Amino acid and protein synthesis                         |                                                             |                  |                           |                           |
| SMU.1950                                                 | putative pseudouridylate synthase                           | 1.58             | 4.70E-03                  |                           |
| SMU.2007                                                 | 50S ribosomal protein L15                                   | -1.87            | 3.40E-03                  | v                         |
| SMU.2008                                                 | 50S ribosomal protein L30                                   | -1.64            | 5.20E-03                  | v                         |
| SMU.2011                                                 | 50S ribosomal protein L6 (BL10)                             | -1.6             | 2.50E-03                  | v                         |
| SMU.364                                                  | glutamine synthetase type 1 glutamate—ammonia ligase        | -1.62            | 1.80E-03                  | v                         |
| Fatty acid and phospholipid metabolism                   |                                                             |                  |                           |                           |
| SMU.1734c                                                | acetyl-CoA carboxylase alpha subunit                        | -1.48            | 4.60E-03                  |                           |
| SMU.1735c                                                | acetyl-CoA carboxylase beta subunit                         | -1.67            | 6.00E-04                  |                           |
| SMU.1739c                                                | 3-oxoacyl-(acyl-carrier-protein) synthase                   | -2.03            | 7.90E-05                  |                           |

|                         |                                                                            |       |          |   |
|-------------------------|----------------------------------------------------------------------------|-------|----------|---|
| SMU.1740c               | 3-oxoacyl-acyl-carrier-protein reductase / 3-ketoacyl-acyl carrier protein | -2    | 2.00E-04 | v |
| SMU.1741c               | malonyl-CoA (acyl-carrier-protein) transacylase                            | -1.94 | 6.60E-05 | v |
| SMU.1744c               | 3-oxoacyl-[acyl-carrier-protein] synthase III                              | -1.88 | 1.40E-03 |   |
| SMU.1745c               | putative transcriptional regulator                                         | -1.79 | 1.10E-03 | v |
| Transcription regulator |                                                                            |       |          |   |
| SMU.1361c               | putative transcriptional regulator (TetR family)                           | -3.94 | 3.10E-03 |   |
| Cell envelop related    |                                                                            |       |          |   |
| SMU.1340                | putative surfactin synthetase                                              | -2.05 | 3.50E-03 | v |
| SMU.610                 | cell surface antigen SpaP                                                  | 1.61  | 4.50E-03 | v |
| SMU.987                 | cell wall-associated protein precursor WapA                                | 2.04  | 5.00E-03 | v |
| Cellular process        |                                                                            |       |          |   |
| SMU.1050                | phosphoribosylpyrophosphate synthetase, PRPP synthetase                    | 1.92  | 8.10E-03 |   |
| SMU.1342                | putative bacitracin synthetase 1 BacA                                      | -1.62 | 6.30E-03 |   |
| Other                   |                                                                            |       |          |   |
| SMU.1363c               | putative transposase                                                       | -7.15 | 7.30E-05 |   |

@, Genes identified in the LuxS-deficient mutant at the level of  $P < 0.01$  are grouped based upon the description and putative functions of the *S. mutans* genome database. \* Defined as levels of expression in the LuxS-deficient mutant relative to those of the wild-type, with “-“ representing down-regulation. \*\*, Genes that were also identified in the LuxS-deficient mutants by the Sztajer group were marked with “v”, with a “d” and a “y” in parentheses representing those that were density-dependent and those that were reverted to the wild-type level with inclusion of synthetic AI-2, respectively.
