# Supplementary material
Source: PubMed Central journal article supplement (PMC3105442)
Supplement: NIHMS278020-supplement-Table_2S.pdf [file NIHMS278020-supplement-Table_2S.pdf]

**Table S2. Classification of genes identified in LuxS-deficient *S. mutans* biofilms ( $P < 0.01$ )<sup>@</sup>**

| Locus                  | Description and putative functions | Fold Change (lx/wt)* | Parametric P-value | Status in Sztajer's study |
|------------------------|------------------------------------|----------------------|--------------------|---------------------------|
| Hypothetical proteins: |                                    |                      |                    |                           |
| SMU.09                 | conserved hypothetical protein     | -2.67                | 1.55E-05           |                           |
| SMU.12                 | conserved hypothetical protein     | -2.8                 | 3.85E-05           | V                         |
| SMU.1284c              | conserved hypothetical protein     | -1.56                | 0.004691           |                           |
| SMU.1402c              | conserved hypothetical protein     | 1.77                 | 0.0014117          |                           |
| SMU.1403c              | conserved hypothetical protein     | 1.77                 | 0.001963           |                           |
| SMU.1404c              | conserved hypothetical protein     | 1.77                 | 0.0009305          |                           |
| SMU.1411               | conserved hypothetical protein     | 1.66                 | 0.001254           |                           |
| SMU.1574c              | conserved hypothetical protein     | -1.99                | 5.19E-05           |                           |
| SMU.2129c              | conserved hypothetical protein     | -1.89                | 0.0002728          |                           |
| SMU.2147c              | conserved hypothetical protein     | -1.89                | 0.0071272          | V                         |
| SMU.475                | conserved hypothetical protein     | 1.79                 | 7.98E-05           | V                         |
| SMU.528c               | conserved hypothetical protein     | -1.51                | 0.000311           |                           |
| SMU.600c               | conserved hypothetical protein     | 1.75                 | 9.11E-05           |                           |
| SMU.63c                | conserved hypothetical protein     | -1.83                | 0.0016925          |                           |
| SMU.66                 | conserved hypothetical protein     | 1.63                 | 0.0027803          |                           |
| SMU.673                | conserved hypothetical protein     | -1.63                | 0.0014519          |                           |
| SMU.730                | conserved hypothetical protein     | -1.71                | 0.0008219          | V (d)                     |
| SMU.86                 | conserved hypothetical protein     | 1.93                 | 0.0007914          |                           |
| SMU.955                | conserved hypothetical protein     | 1.72                 | 0.0055615          |                           |
| SMU.961                | conserved hypothetical protein     | -2.46                | 0.0071689          | V                         |
| SMU.1249c              | hypothetical protein               | -1.55                | 0.0015606          |                           |
| SMU.1250c              | hypothetical protein               | -1.66                | 0.003752           |                           |
| SMU.1360c              | hypothetical protein               | -1.53                | 0.0056236          | V                         |
| SMU.150                | hypothetical protein               | 4.71                 | 0.0037364          |                           |
| SMU.151                | hypothetical protein               | 4.07                 | 0.0078298          | V                         |
| SMU.152                | hypothetical protein               | 4.36                 | 0.0038355          |                           |
| SMU.1575c              | hypothetical protein               | -3.46                | 0.0088639          | V                         |
| SMU.1576c              | hypothetical protein               | -3.53                | 0.0076243          |                           |
| SMU.1587c              | hypothetical protein               | 1.96                 | 1.90E-05           |                           |
| SMU.1644c              | hypothetical protein               | -2.06                | 0.0026085          |                           |
| SMU.1882c              | hypothetical protein               | -1.56                | 0.0035699          | V                         |
| SMU.1895c              | hypothetical protein               | -1.73                | 0.0002307          | V                         |
| SMU.1896c              | hypothetical protein               | -1.91                | 3.69E-05           | V (d)                     |
| SMU.1903c              | hypothetical protein               | 3.62                 | 0.0082214          |                           |
| SMU.1904c              | hypothetical protein               | 3.6                  | 0.0096415          |                           |
| SMU.1908c              | hypothetical protein               | 3.68                 | 0.0057835          |                           |
| SMU.1910c              | hypothetical protein               | 4.18                 | 0.0066595          |                           |
| SMU.1956c              | hypothetical protein               | 4.71                 | 0.0003907          |                           |

|                                             |                                                                           |       |           |          |
|---------------------------------------------|---------------------------------------------------------------------------|-------|-----------|----------|
| SMU.503c                                    | hypothetical protein                                                      | 1.68  | 0.0003793 |          |
| SMU.618                                     | hypothetical protein                                                      | 1.62  | 0.0007179 | V (d)    |
| SMU.637c                                    | hypothetical protein                                                      | -2.21 | 0.0072757 |          |
| SMU.68                                      | hypothetical protein                                                      | 2.08  | 0.0009764 | V (d)    |
| SMU.735                                     | hypothetical protein                                                      | -1.57 | 0.0005981 |          |
| SMU.836                                     | hypothetical protein                                                      | 2.16  | 0.0020564 |          |
| SMU.925                                     | hypothetical protein                                                      | 2.35  | 0.0025068 |          |
| SMU.984                                     | hypothetical protein                                                      | 1.68  | 0.0004756 | V (d)    |
| Stress response                             |                                                                           |       |           |          |
| SMU.1527                                    | FoF1 membrane-bound proton-translocating ATPase, epsilon subunit          | 1.63  | 0.0010918 |          |
| SMU.1528                                    | FoF1 membrane-bound proton-translocating ATPase, beta subunit             | 1.59  | 0.0013416 |          |
| SMU.1529                                    | FoF1 membrane-bound proton-translocating ATPase, gamma subunit            | 1.64  | 0.0010764 |          |
| SMU.1531                                    | FoF1 membrane-bound proton-translocating ATPase, delta subunit            | 1.74  | 0.0002825 |          |
| SMU.1532                                    | FoF1 membrane-bound proton-translocating ATPase, b subunit                | 1.68  | 0.0005269 | V (d)    |
| Carbohydrate, energy and central metabolism |                                                                           |       |           |          |
| SMU.101                                     | putative sorbose PTS system, IIC component                                | 1.77  | 0.0001027 | V        |
| SMU.102                                     | putative PTS system, IID component                                        | 1.83  | 0.0010273 |          |
| SMU.103                                     | putative PTS system, IIA component                                        | 1.87  | 0.0007384 | V (d, y) |
| SMU.104                                     | putative alpha-glucosidase glycosyl hydrolase                             | 1.78  | 0.0036597 |          |
| SMU.1077                                    | putative phosphoglucomutase                                               | 1.6   | 0.0001274 | V        |
| SMU.127                                     | putative acetoin dehydrogenase (TPP-dependent), E1 component alpha        | -2.24 | 2.30E-06  |          |
| SMU.128                                     | putative acetoin dehydrogenase (TPP-dependent), E1 component beta         | -2.79 | 2.90E-06  |          |
| SMU.129                                     | putative dihydrolipoamide acetyltransferase                               | -2.99 | 3.80E-06  | V        |
| SMU.130                                     | putative dihydrolipoamide dehydrogenase                                   | -2.79 | 4.60E-06  |          |
| SMU.131                                     | putative lipoate-protein ligase                                           | -3.33 | 3.00E-07  |          |
| SMU.132                                     | putative hippurate amidohydrolase                                         | -3.01 | 2.00E-07  | V (d, y) |
| SMU.1452                                    | alpha-acetolactate synthase                                               | -1.56 | 0.0003851 | V        |
| SMU.148                                     | putative alcohol-acetaldehyde dehydrogenase                               | 2.7   | 2.00E-07  | V        |
| SMU.1568                                    | putative maltose/maltodextrin ABC transporter, sugar-binding protein MalX | 1.67  | 1.61E-05  | V        |
| SMU.1569                                    | putative maltose/maltodextrin ABC transporter, permease protein MalF      | 1.63  | 7.81E-05  |          |
| SMU.1570                                    | putative maltose/maltodextrin ABC transporter, MalG permease              | 1.66  | 1.34E-05  |          |
| SMU.1598                                    | putative PTS system, cellobiose-specific IIA component                    | 2.82  | 0.0087769 |          |
| SMU.1879                                    | putative PTS system, mannose-specific component IID                       | 2.02  | 0.0001966 |          |
| SMU.1957                                    | putative PTS system, mannose-specific IID component                       | 4.56  | 0.0002682 |          |
| SMU.1958c                                   | putative PTS system, mannose-specific IIC component                       | 4.16  | 0.0002943 |          |
| SMU.1960c                                   | putative PTS system, mannose-specific IIB component                       | 3.27  | 0.0009091 | V        |
| SMU.1961c                                   | putative PTS system, sugar-specific enzyme IIA component                  | 4.23  | 0.0011744 |          |
| SMU.671                                     | citrate synthase                                                          | -1.93 | 0.0020076 |          |
| SMU.672                                     | isocitrate dehydrogenase                                                  | -2.1  | 0.0018402 |          |
| SMU.878                                     | multiple sugar-binding ABC transporter, sugar-binding protein precursor   | 1.94  | 0.0003333 | V (d)    |
| SMU.879                                     | multiple sugar-binding ABC transporter, permease protein MsmF             | 1.7   | 0.0045663 |          |

|                                        |                                                                               |       |           |          |
|----------------------------------------|-------------------------------------------------------------------------------|-------|-----------|----------|
| SMU.880                                | multiple sugar-binding ABC transporter, permease protein MsmG                 | 1.87  | 0.0010886 |          |
| SMU.881                                | sucrose phosphorylase, GtfA                                                   | 2.07  | 0.0006337 |          |
| SMU.882                                | multiple sugar-binding ABC transporter, ATP-binding protein, MsmK             | 2.05  | 0.0005783 |          |
| SMU.883                                | dextran glucosidase DexB                                                      | 2.06  | 0.0001632 |          |
| SMU.985                                | putative beta-glucosidase                                                     | 1.73  | 0.0006083 |          |
| Nucleic acid metabolism and DNA repair |                                                                               |       |           |          |
| SMU.08                                 | putative transcription-repair coupling factor                                 | -1.78 | 0.0037726 | V        |
| SMU.356                                | purine operon repressor                                                       | -2.18 | 0.0006405 | V        |
| SMU.44                                 | conserved hypothetical protein, (possible DNA mismatch repair)                | -6.67 | 1.87E-05  | V (d, y) |
| SMU.43                                 | putative site-specific DNA-methyltransferase restriction-modification protein | -4.62 | 1.94E-05  | V        |
| SMU.47                                 | hypothetical protein, (putative HNH-type endonuclease)                        | -4.41 | 0.0015788 | V        |
| SMU.504                                | putative site-specific DNA-methyltransferase                                  | -1.7  | 0.0079468 |          |
| SMU.64                                 | Holliday junction DNA helicase RuvB                                           | 1.67  | 0.0068071 |          |
| Protein synthesis                      |                                                                               |       |           |          |
| SMU.07                                 | putative peptidyl-tRNA hydrolase                                              | -1.63 | 0.0092027 |          |
| SMU.1510                               | putative phenylalanyl-tRNA synthetase (beta subunit)                          | 1.84  | 0.0005145 |          |
| SMU.1586                               | putative threonyl-tRNA synthetase                                             | 2.09  | 0.0003764 | V        |
| SMU.1821c                              | putative glutamyl-tRNA (Gln) amidotransferase subunit C                       | 1.71  | 0.0013321 |          |
| SMU.558                                | isoleucine-tRNA synthetase                                                    | 2.11  | 8.91E-05  | V        |
| SMU.84                                 | putative tRNA pseudouridine synthase A                                        | 1.68  | 0.0001738 |          |
| Transporters                           |                                                                               |       |           |          |
| SMU.1063                               | putative ABC transporter, ATP-binding protein, proline/glycine betaine        | -1.67 | 0.00198   |          |
| SMU.1119c                              | putative sugar ABC transporter, permease protein                              | 1.88  | 0.0030978 |          |
| SMU.1121c                              | putative ABC transporter                                                      | 1.68  | 0.0052076 |          |
| SMU.1788c                              | putative bacterocin transport accessory protein, Bta                          | -1.57 | 0.0014281 |          |
| SMU.602                                | putative sodium-dependent transporter                                         | 1.52  | 0.0024142 |          |
| Transcriptional regulators             |                                                                               |       |           |          |
| SMU.1027                               | putative transcription regulator                                              | -2.05 | 0.0003367 |          |
| SMU.105                                | putative transcriptional regulator repressor of sugar transport               | 1.66  | 0.0047994 |          |
| SMU.1282                               | putative transcriptional regulator                                            | -1.96 | 0.0069287 | V        |
| SMU.144c                               | putative transcriptional regulator                                            | -1.51 | 0.0002565 |          |
| SMU.46                                 | hypothetical protein, (putative LuxR-type of regulator)                       | -6.57 | 0.0004281 | V        |
| SMU.930c                               | putative transcriptional regulator                                            | -2.59 | 0.0003519 |          |
| SMU.953c                               | putative transcriptional regulator/aminotransferase                           | -1.55 | 0.0002725 | V        |
| Cell envelop related                   |                                                                               |       |           |          |
| SMU.609                                | putative 40K cell wall protein precursor                                      | 1.6   | 0.0072096 |          |
| SMU.1437                               | putative UDP-N-acetylglucosamine 2-epimerase                                  | -1.56 | 0.0012153 |          |
| SMU.574c                               | putative membrane protein                                                     | 4.47  | 0.0052827 |          |
| SMU.732                                | conserved hypothetical protein possible inner membrane protein                | -1.58 | 0.0005442 |          |

|                      |                                                                     |       |           |          |
|----------------------|---------------------------------------------------------------------|-------|-----------|----------|
| Cellular process     |                                                                     |       |           |          |
| SMU.13               | putative cell-cycle protein                                         | -1.77 | 0.0022179 | V        |
| SMU.65               | putative protein tyrosine-phosphatase                               | 1.93  | 0.0025818 |          |
| SMU.299c             | putative bacteriocin peptide precursor                              | -1.62 | 0.0009831 |          |
| SMU.926              | conserved hypothetical protein possible GTP-pyrophosphokinase, RelP | 1.6   | 0.0015504 |          |
| SMU.423              | hypothetical protein, mutacin-like protein                          | 5.23  | 0.002112  |          |
| Unknown and unsigned |                                                                     |       |           |          |
| SMU.1337c            | putative alpha/beta superfamily hydrolase                           | 2.08  | 0.0036599 | V        |
| SMU.1511c            | putative acetyltransferase                                          | 1.72  | 0.0005328 | V (d, y) |
| SMU.2154c            | putative peptidase                                                  | -1.71 | 0.0022015 | V        |
| SMU.67               | putative acyltransferase                                            | 1.79  | 0.0002638 |          |
| Fatty acids          |                                                                     |       |           |          |
| SMU.1336             | conserved hypothetical protein PksD, involved in polyketide         | -2.69 | 0.0097701 | V        |
| Other                |                                                                     |       |           |          |
| SMU.149              | putative transposase                                                | 1.93  | 0.0048977 | V        |
| Signal transduction  |                                                                     |       |           |          |
| SMU.928              | putative histidine kinase, RelS                                     | 1.56  | 0.0051509 |          |

<sup>@</sup>, Genes identified in the LuxS-deficient mutant at the level of  $P < 0.01$  are grouped based upon the description and putative functions of the *S. mutans* genome database. See Table S1 for more information.
